# Supplementary material for: Rapid 40 kb Genome Construction from 52 Parts through Data-optimized Assembly Design
Source: PubMed Central journal article supplement — ACS Synth Biol. 2022 May 25;11(6):2036–42. doi: 10.1021/acssynbio.1c00525 (PMC9208013; doi:10.1021/acssynbio.1c00525), 2022-05-25
Supplement: sb1c00525_si_001.pdf [file sb1c00525_si_001.pdf]

## **Supporting Information**

# **Rapid 40 kb Genome Construction From 52 Parts Through Data-Optimized Assembly Design**

John M. Pryor, Vladimir Potapov, Katharina Bilotti, Nilisha Pokhrel, Gregory J. S. Lohman\*

Research Department, New England Biolabs, Ipswich, MA, 01938, USA

\*To whom correspondence should be addressed. Email: [lohman@neb.com](mailto:lohman@neb.com)

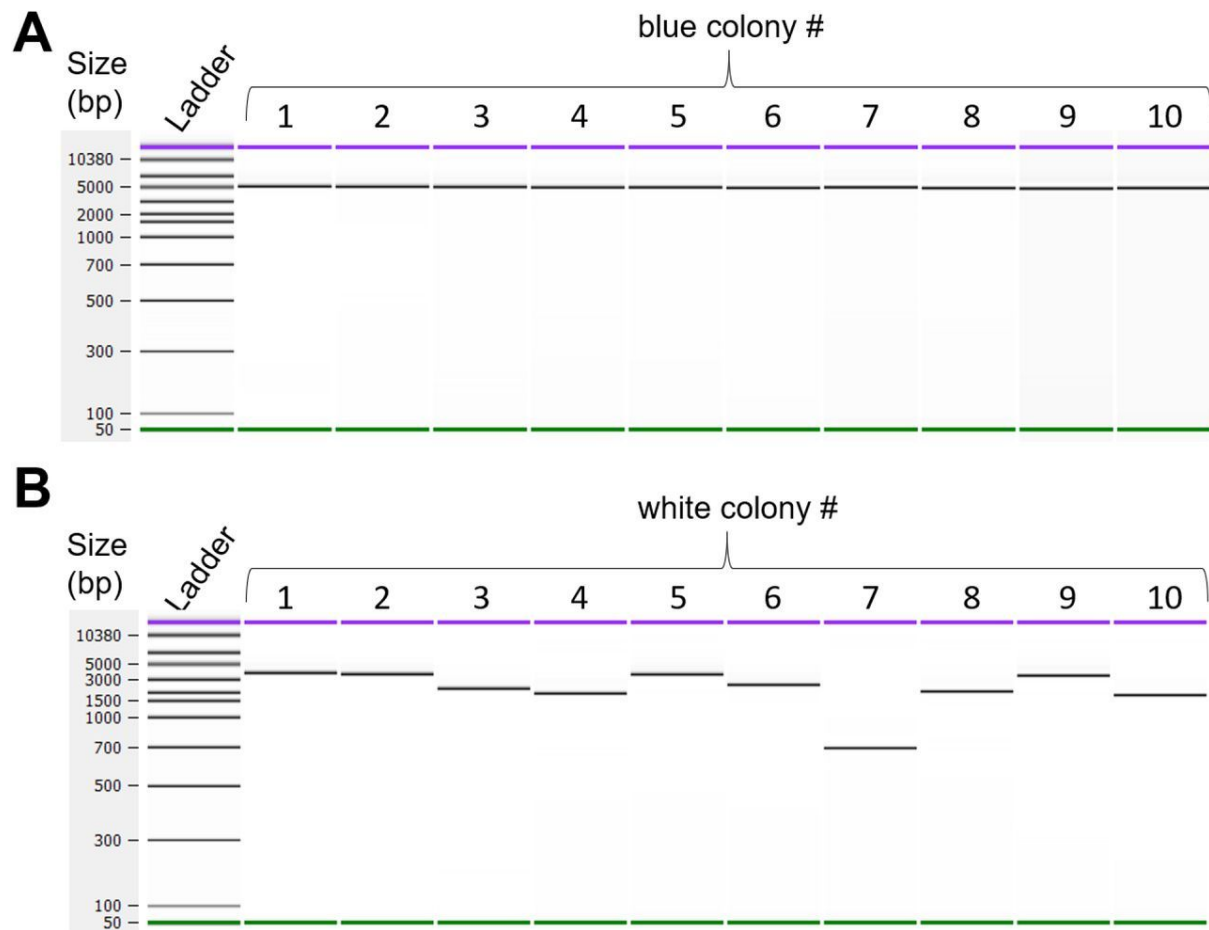

**Figure S1. Verification of the 52-fragment *lac* operon cassette assembly.**

Plasmid DNA was isolated from colonies using the Monarch Plasmid Miniprep kit and subjected to PCR with amplification primers that flank the desired insertion site. As anticipated, (A) blue colonies contained inserts of the expected size for correct assembly of all 52 fragments, and (B) white colonies harbored constructs carrying truncated assembly products.

**Figure S2.** Schematic of the T7 bacteriophage genome noting the location of SapI sites, BsmBI sites, NdeI sites, and the annealing location of the 8 primers used to verify the presence or absence of these sites in plaque analysis. The CDS annotated in GenBank for this genome are also shown. A GenBank file of the full genome with these annotations is also provided as part of the Supporting Materials.

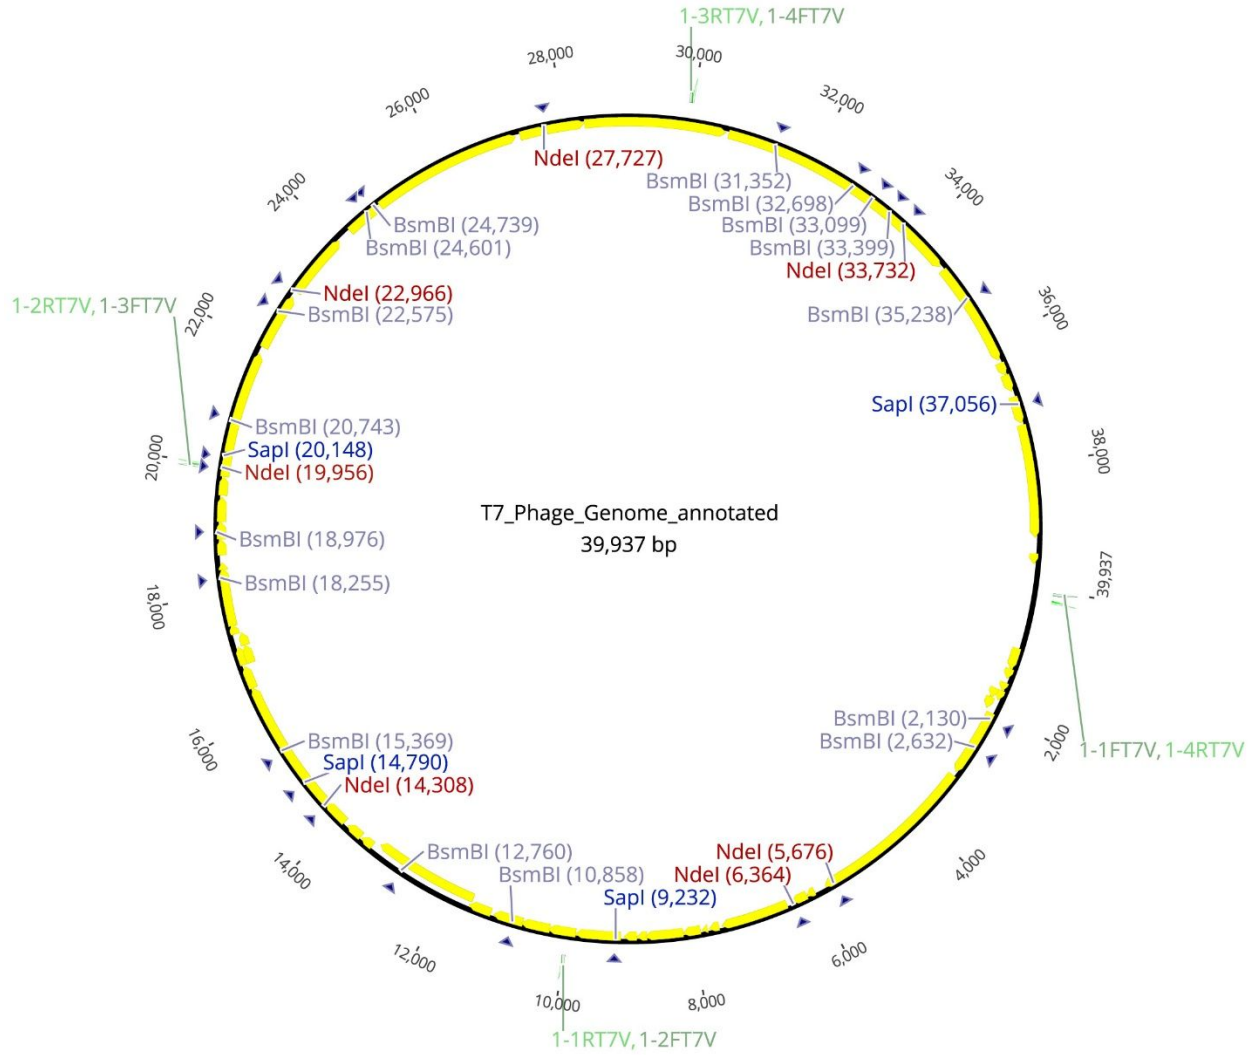

**Figure S3. Schematic of the SapI 10 fragment assembly of the T7 phage genome.** Fusion sites, sites of silent mutations used to remove native SapI recognition sites, and the binding location of all primers used to generate fragments are shown. A GenBank file of the full genome with these annotations is also provided as part of the Supporting Materials.

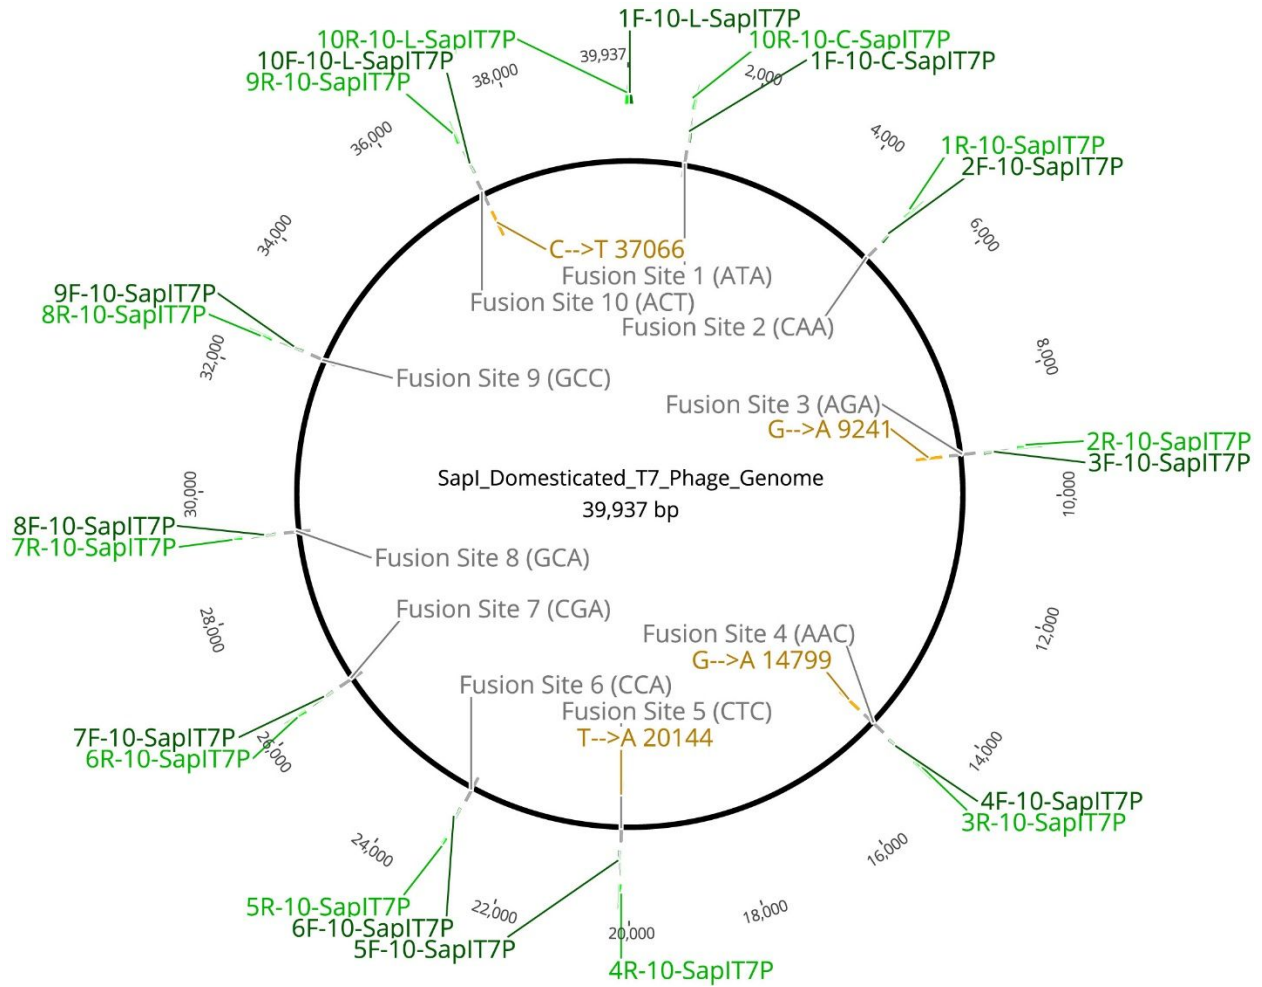

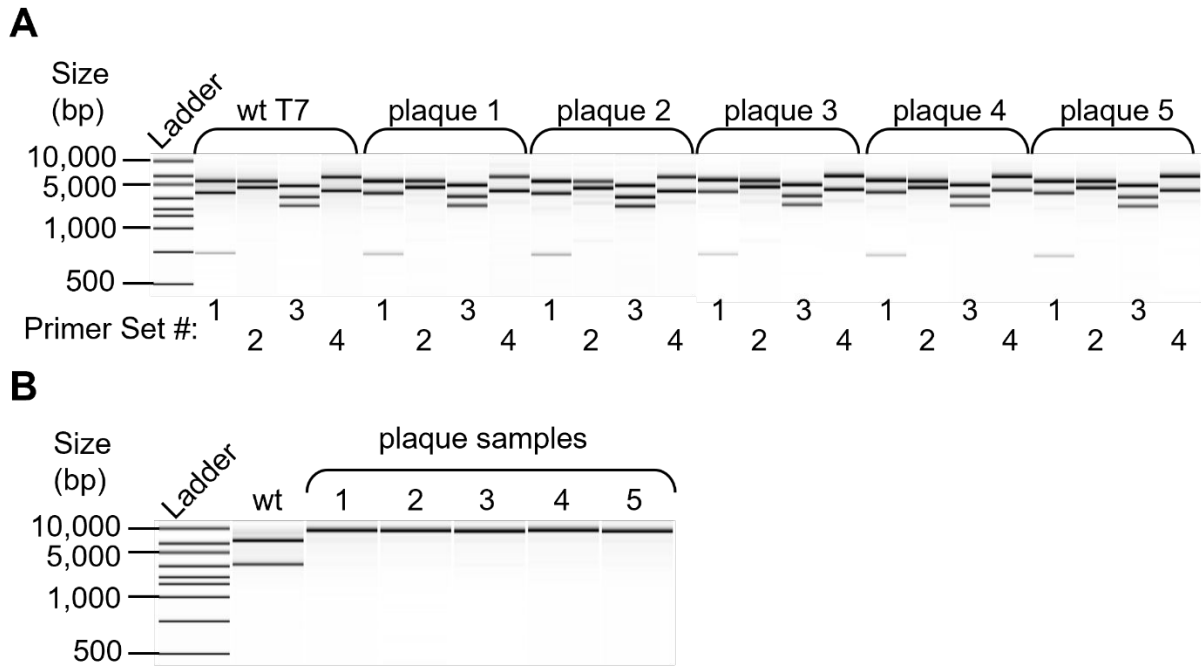

**Figure S4. Verification of successful assembly of the T7 bacteriophage genome from 10-fragments.** Plaque PCR was carried out using amplification primers (1-4) that span the 40 kb T7 phage genome (sequences shown in Table S4). Amplicons from five phage plaques (1-5) were compared to the parental wt T7 phage genome (wt) after restriction digest with NdeI. In all cases, the phage plaques produced a digestion pattern identical to the parental wt T7 phage. (B) To confirm that the assembled genomes harbored the desired silent mutations to remove native SapI restriction sites, we carried out amplicon digestion with SapI and showed that amplicon 4 from the parental T7 phage genome (wt) is sensitive to digestion by SapI, whereas amplicons from assembled genomes are inert to cleavage.

**Figure S5. Schematic of the BsmBI 52 fragment assembly of the T7 phage genome.** Fusion sites, sites of silent mutations used to remove native BsmBI recognition sites, and the binding location of all primers used to generate fragments are shown. A GenBank file of the full genome with these annotations is also provided as part of the Supporting Materials.

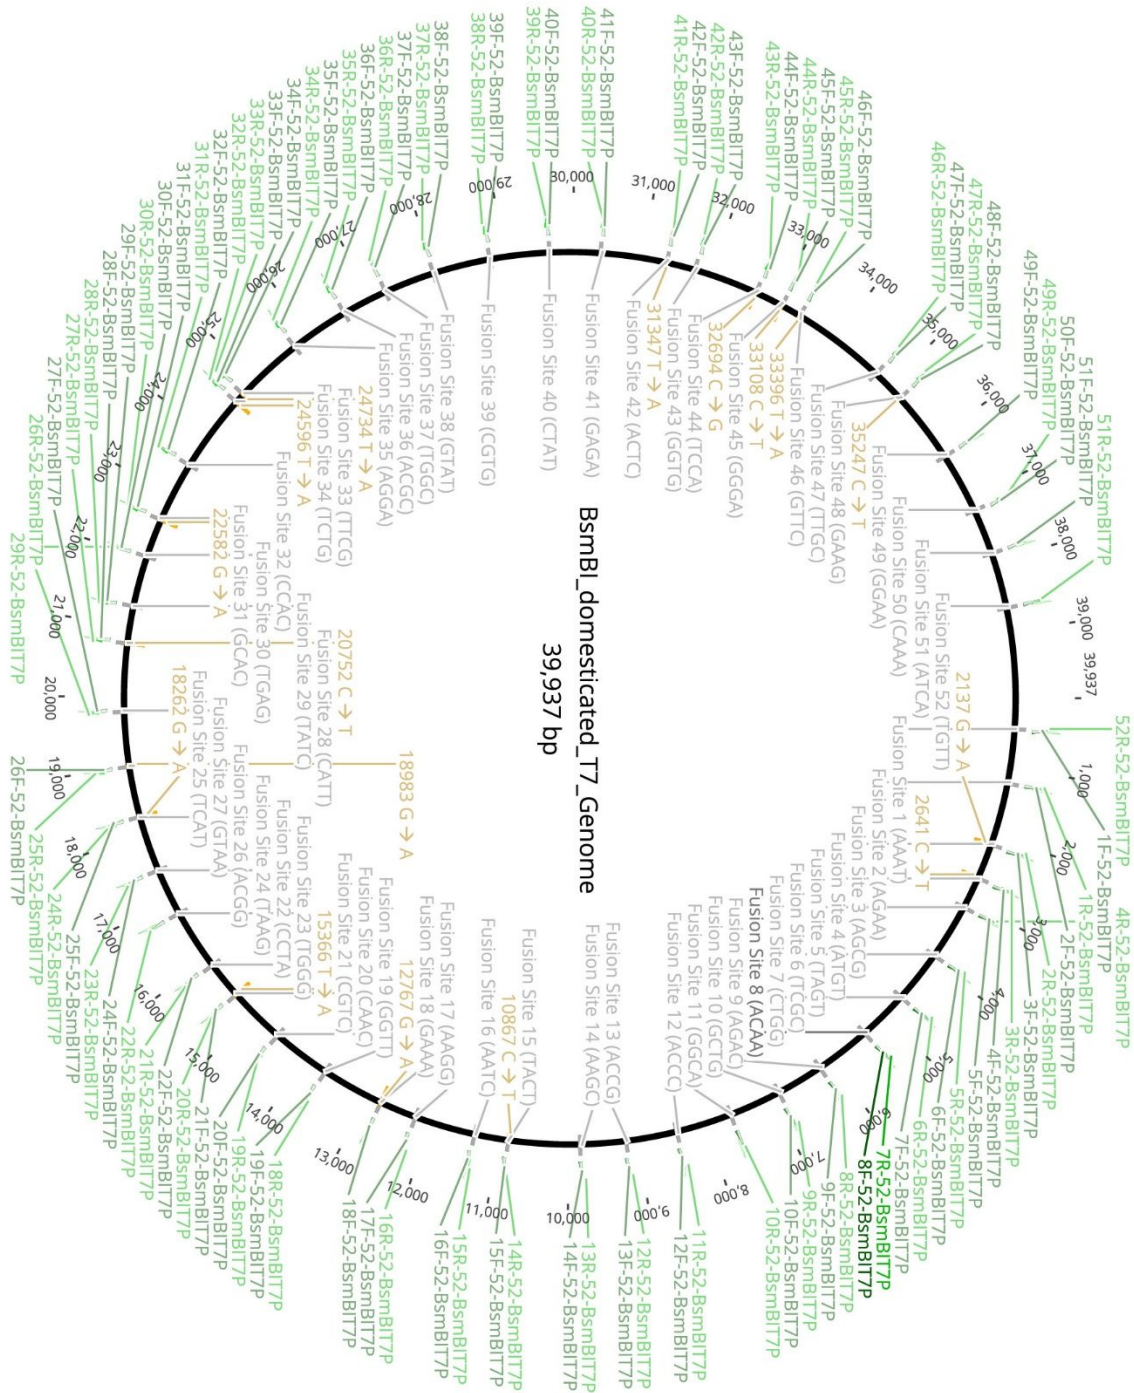

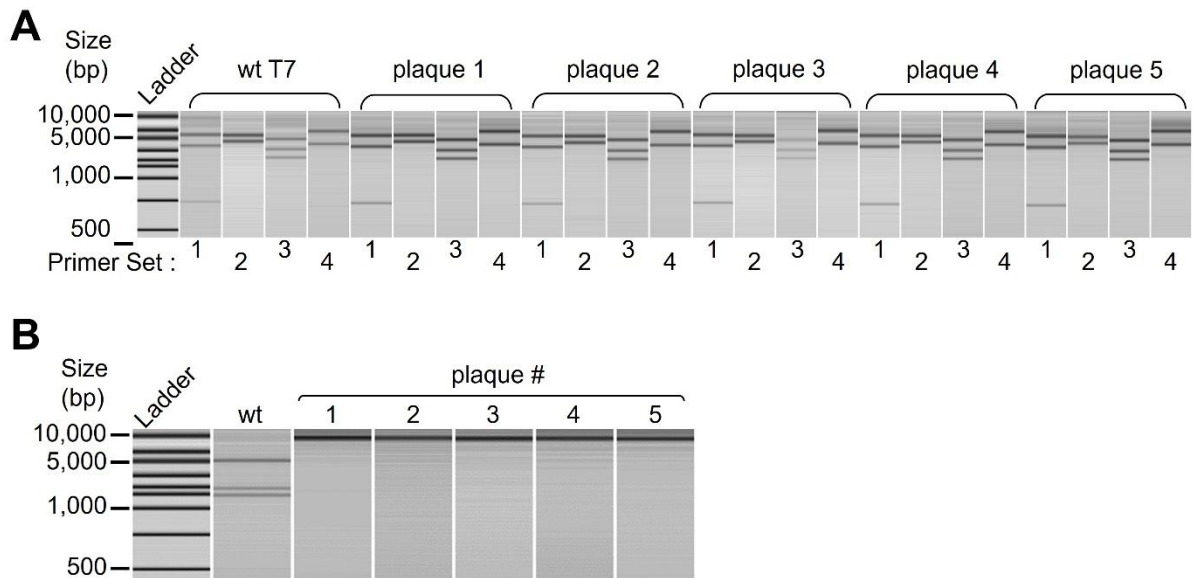

**Figure S6. Verification of successful assembly of the T7 bacteriophage genome from 52-fragments.** PCR amplification of genomic DNA from phage plaques was carried out using four sets of amplification primers (1-4) that span the T7 phage genome. Amplicons from 5 phage plaques (1-5) from the 52-fragment genome assembly reactions (90 cycles) were compared to the parental wt T7 phage genome (wt) after restriction enzyme digest with NdeI (A) or BsmBI (B). Comparison of amplicons digested with NdeI showed an identical digestion pattern across wt T7 phage and all assembled genome samples. Amplicon 4 from the parental T7 phage genome is sensitive to digest by BsmBI, but the same amplicon from the assembled genomes is inert to cleavage, indicating the successful introduction of the intended silent mutations into the phage genome.

**Table S1. Overhang sequences for the 52-fragment *lac* cassette assembly reactions<sup>a</sup>**

| Number of Fragments | Overhang Sequences (5' to 3')                                                                                                                                                                                                                                                            |
|---------------------|------------------------------------------------------------------------------------------------------------------------------------------------------------------------------------------------------------------------------------------------------------------------------------------|
| 52                  | GGAG,CCAG,ATGT,TACA,GGCA,TATC,TAAG,CAGC,GAAC,CAAC,GCT<br>T,TAGT,CTAT,GGAA,TTCG,AGAC,GTAT,GCGT,GATT,TTAC,TATT,TCG<br>T,CAGA,GGGA,CTCA,GCAA,TGGA,CGTC,AACC,AGTA,TAGA,GAAA,A<br>GGG,TTCT,ACAA,AGGT,TGTT,GAGT,TGGC,ACCG,ATTA,GTGC,AGCG,<br>TCTT,CGTG,CCGA,ATCA,TCTC,CAAA,TTCA,TAGG,TATG,CCAT |



Table S2. 52 fragment lac operon cassette assembly fragments and overhang sequences

| Fragment # | Assembly Fragment Sequence (including Type IIS recognition sequence)                                                                                       |
|------------|------------------------------------------------------------------------------------------------------------------------------------------------------------|
| 1          | GGTCTCGGGAGTCATTTTTGACACCAGACCAACTGGTAATGGTAGCGACCGGCGCTCAGCTGGAATTCGCCGATACTGACGGGCTCCAGCGAGACC                                                           |
| 2          | GGTCTCGCCAGGAGTCGTCGCCACCAATCCCCATATGGAAACCGTCGATATTCAGCCATGTGCCTTCTTCCGCGTGCAGCAGATGGCGATGGCTGGTTTCCATCAGTTGCTGTTGACTGTAGCGGCTGATGTCGAGACC                |
| 3          | GGTCTCGATGTTGAACTGGAAGTCGCCGCGCCACTGGTGTGGGCCATAATTC AATTCGCGCGTCCCGCAGCGCAGACC                                                                            |
| 4          | GGTCTCGTACATGTCTGACAATGGCAGATCCCAGCGGTCAA AACAGGCGGCACGAGACC                                                                                               |
| 5          | GGTCTCGGGCAGTAAGGCGGTCTGGGATAGTTTTCTTGCGGCCCTAATCCGAGCCAGTTTACCCGCTCTGCTACCTGCGCCAGCTGGCAGTTCAGGCCAATCCGCGCCGGATGCGGTGTATCCGAGACC                          |
| 6          | GGTCTCGTATCGCTCGCCACTTCAACATCAACGGTAATCGCCATTTGACCACTACCATCAATCCGGTAGGTTTTCCGGCTGATAAATAAGCGAGACC                                                          |
| 7          | GGTCTCGTAAGGTTTTCCCCTGATGCTGCCACGCGTGAGCGGTCTGTAATCAGCACC GCATCAGCAAGTGTATCTGCGTGCACTGCAACAACGCTGCTTCGGCCTGGTAATGGCCCGCCGCTTCCAGCCGAGACC                   |
| 8          | GGTCTCGCAGCGTTCGACCCAGGCGTTAGGGTCAATGCGGGTCGCTTCACTTACGCCAATGTCGTTATCCAGCGGTGCACGGGTGAACCGAGACC                                                            |
| 9          | GGTCTCGGAACTGATCGCGCAGCGGCGTCAGCAGTTGTTTTTATCGCCAATCCACATCTGTGAAAGAAAGCCTGACTGGCGGTTAAATTGCCAACCGAGACC                                                     |
| 10         | GGTCTCGCAACGCTTATTACCCAGCTCGATGCAAAAATCCATTTTCGCTGGTGGTCAGATGCGGGATGGCGTGGGACGCGGCGGGGAGCGTCACACTGAGGTTTTCCGCCAGACGCCACTGCTGCCAGGCGCTGATGTGCCCGGCTTCGAGACC |
| 11         | GGTCTCGGCTTCTGACCATGCGGTGCGGTTCCGTTGCACTACGCGTACTGTGAGCCAGAGTTGCCCGGCGCTCTCCGGCTGCGGTAGTCGAGACC                                                            |
| 12         | GGTCTCGTAGTTCAGGCAGTTCAATCAACTGTTTACCTTGTGGAGCGACATCCAGAGGCACTTCACCGCTTGCCAGCGGCTTACCATCCAGCGCCACCATCCAGTGCAGGAGCTCGTTATCGCTATCGAGACC                      |
| 13         | GGTCTCGCTATGACGGAACAGGTATTCGCTGGTCACTTCGATGGTTTGCCCGGATAAACGGAACGGAACGAGACC                                                                                |
| 14         | GGTCTCGGGAAAACTGCTGCTGGTGTGTTTTGCTTCCGTCAGCGCTGGATGCGGCGTGC GGTCGGCAAAGACCAGACCGTTCATACAGA ACTGGCGATCGTTCGCGAGACC                                          |
| 15         | GGTCTCGTTCGGCGTATCGCCAAAATCACCGCCGTAAGCCGACCACGGGTTGCCGTTTTCATCATATTTAATCAGCGACTGATCCACCCAGTCCAGACCGAGACC                                                  |
| 16         | GGTCTCGAGACGAAGCCGCCCTGTAAACGGGGATACTGACGAAACGCCTGCCAGTATTTAGCGAAACCGCCAAGACTGTTACCCATCGCGTGGGCGTATCGAGACC                                                 |
| 17         | GGTCTCGGTATTCGCAAAGGATCAGCGGGCGCGTCTCTCCAGGTAGCGAAAGCCATTTTTTGATGGACCATTTCCGCACAGCCGGGAAGGGCTGGTCTTCATCCACGCGCGTCGAGACC                                    |

|    |                                                                                                                                                          |
|----|----------------------------------------------------------------------------------------------------------------------------------------------------------|
| 18 | GGTCTCGGCGTACATCGGGCAAATAATATCGGTGGCCGTGGTGTTCGGCTCCGCCCTTCATACTGCACCGGGCGG<br>GAAGGATCGACAGATTTGATCCAGCGATACAGCGCGTCGTGATTCGAGACC                       |
| 19 | GGTCTCGGATTAGCGCCGTGGCCTGATTCATTCCCCAGCGACCAGATGATCACACTCGGGTGATTACGATCGCGCT<br>GCACCATTCGCGTTACCGAGACC                                                  |
| 20 | GGTCTCGTTACGCGTTTCGCTCATCGCCGGTAGCCAGCGCGGATCATCGGTCAGACGATTCATTGGCACCATGCCGT<br>GGGTTTCAATATTCGAGACC                                                    |
| 21 | GGTCTCGTATTGGCTTCATCCACCACATACAGGCCGTAGCGGTTCGCACAGCGTGTACCACAGCGGATGGTTCGGAT<br>AATGCGAACAGCGCACGGCGTTAAAGTTGTTCTGCTTCATCAGCAGGATATCCTGCACCATCGTCGAGACC |
| 22 | GGTCTCGTCGTCTGCTCATCCATGACCTGACCATGCAGAGGATGATGCTCGTGACGGTTAACGCCTCGAATCAGCA<br>ACGGCTTGCCGTTACGCAGCAGCAGACGAGACC                                        |
| 23 | GGTCTCGCAGACCATTTTCAATCCGCACCTCGCGGAAACCGACATCGCAGGCTTCTGCTTCAATCAGCGTGCCGTC<br>GGCGGTGTGCAGTTCAACCACCGCACGATAGAGATTCGGGACGAGACC                         |
| 24 | GGTCTCGGGGATTTTCGGCGCTCCACAGTTTCGGGTTTTTCGACGTTTCAGACGTAGTGTGACGCGATCGGCATAACCA<br>CCACGCTCACGAGACC                                                      |
| 25 | GGTCTCGCTCATCGATAATTTACCCGCCGAAAGGCGCGGTGCCGCTGGCGACCTGCGTTTTACCCTGCCATAAAGA<br>AACTGTTACCCGTAGGTAGTCACGCAACGAGACC                                       |
| 26 | GGTCTCGGCAACTCGCCGCACATCTGAACTTCAGCCTCCAGTACAGCGCGGCTGAAATCATCATTAAAGCGAGTGG<br>CAACATGGACGAGACC                                                         |
| 27 | GGTCTCGTGAAATCGCTGATTTGTGTAGTCGGTTTATGCAGCAACGAGACGTCACGGAAAATGCCGCTCATCCGC<br>CACATATCCTGATCTTCCAGATAACTGCCGTCCGAGACC                                   |
| 28 | GGTCTCGCGTCACTCCAGCGCAGCACCATCACCGCGAGGCGGTTTTCTCCGGCGCGTAAAAATGCGCTCAGGTCAA<br>ATTCAGACGGCAAACGACTGTCTGGCCGTAACCCGAGACC                                 |
| 29 | GGTCTCGAACCGACCCAGCGCCCGTTGCACCACAGATGAAACGCCGAGTTAACGCCATCAAAAATAATTCGCGTCT<br>GGCCTTCCCTGTAGCCAGCTTTCATCAACATTAATGTGAGCGAGTACGAGACC                    |
| 30 | GGTCTCGAGTAACAACCCGTCGGATTCTCCGTGGGAACAAACGGCGGATTGACCGTAATGGGATAGGTCACGTTG<br>GTGTAGACGAGACC                                                            |
| 31 | GGTCTCGTAGATGGGCGCATCGTAACCGTGCATCTGCCAGTTTGAGGGGACGACGACAGTATCGGCCTCAGGAAG<br>ATCGCACTCCAGCCAGCTTTCGGCACCGCTTCTGGTGCCGAAACGAGACC                        |
| 32 | GGTCTCGGAAACCAGGCAAAGCGCCATTTCGCCATTCAGGCTGCGCAACTGTTGGGAAGGGCGATCGGTGCGGGCC<br>TCTTCGCTATTACGCCAGCTGGCGAAAGGGCGAGACC                                    |
| 33 | GGTCTCGAGGGGGATGTGCTGCAAGGCGATTAAGTTGGGTAACGCCAGGTTTTCCAGTCACGACGTTGTAAAC<br>GACGGCCAGTGAATCCGTAATCATGGTCATATGTATATCTCCTTCTCGAGACC                       |
| 34 | GGTCTCGTTCTTAAAGTTAAACAAAATTATTTCTAGAGGGGAATTGTTATCCGCTCACAATTCCACACAACGAGAC<br>C                                                                        |
| 35 | GGTCTCGACAACATACGAGCCGGAAGCATAAAGTGTAAGCCTGGGATCGAGATCTCGATCCTCTACGCCGGACG<br>CATCGTGGCCGGCATCACCGGCCACAGGTCGAGACC                                       |

|    |                                                                                                                                                                        |
|----|------------------------------------------------------------------------------------------------------------------------------------------------------------------------|
| 36 | GGTCTCGAGGTGCGGTTGCTGGCGCCTATATCGCCGACATCACCGATGGGGAAGATCGGGCTCGCCACTTCGGGCT<br>CATGAGCGCTTGTTCGGCGTGGGTATGGTGGCAGGCCCGTGGCCGGGGGACTGTTTCGAGACC                        |
| 37 | GGTCTCGTGTGGGCGCCATCTCCTTGCATGCACCATTCTTTCGGCGGGCGGTGCTCAACGGCCTCAACCTACTACT<br>GGGCTGCTTCTTAATGCAGGAGTCGAGACC                                                         |
| 38 | GGTCTCGGAGTCGCATAAGGGAGAGCGTCGAGATCCCGGACACCATCGAATGGCGCAAACCTTTCGCGGTATGG<br>CCGAGACC                                                                                 |
| 39 | GGTCTCGTGGCATGATAGCGCCCGGAAGAGAGTCAATTCAGGGTGGTGAATGTGAAACCAGTAACGTTATACGAT<br>GTCGCAGAGTATGCCGGTGTCTTATCAGACCCGCGAGACC                                                |
| 40 | GGTCTCGACCGTTTCCCAGCGTGGTGAACCAGGCCAGCCACGTTTCTGCGAAAACCGCGGGAAAAAGTGGAAGCGGC<br>GATGGCGGAGCTGAATTACGAGACC                                                             |
| 41 | GGTCTCGATTACATTCCAACCGCGTGGCACAACAACCTGGCGGGCAAACAGTCGTTGCTGATTGGCGTTGCCACCT<br>CCAGTCTGGCCCTGCACGCGCCGTCGCAAATTGTCGCGGGCGATTAAATCTCGCGCCGATCAACTGGGTGCCGAGAC<br>C     |
| 42 | GGTCTCGGTGCCAGCGTGGTGGTGTTCGATGGTAGAACGAAGCGGGCTCGAAGCCTGTAAAGCGCGAGACC                                                                                                |
| 43 | GGTCTCGAGCGGCGGTGCACAATCTTCTCGCGAACCGGTGAGTGGGCTGATCATTAACTATCCGCTGGATGACCA<br>GGATGCCATTGCTGTGGAAGCTGCCTGCACTAATGTTCCGGCGTTATTTCTTCGAGACC                             |
| 44 | GGTCTCGTCTTGATGTCTGTGACCAGACACCCATCAACAGTATTATTTCTCCCATGAAGACGGTACGCGACTGGGC<br>GTGCGAGACC                                                                             |
| 45 | GGTCTCGCGTGGAGCATCTGGTTCGATTGGGTCACCAGCAAATCGCGCTGTTAGCGGGCCCATTAAGTTCTGTCTC<br>GGCGCGTCTGCGTCTGGCTGGCTGGCATAAATATCTCACTCGCAATCAAATTCAGCCGACGAGACC                     |
| 46 | GGTCTCGCCGATAGCGGAACGGGAAGGCGACTGGAGTGCCATGTCCGGTTTTCAACAAACCATGCAAATGCTGAA<br>TGAGGGCATCGTTCCTACTGCGATGCTGGTTGCCAACGATCACGAGACC                                       |
| 47 | GGTCTCGATCAGATGGCGCTGGGCGCAATGCGCGCCATTACCGAGTCCGGGCTGCGCGTTGGTGC GGATATCTCCG<br>AGACC                                                                                 |
| 48 | GGTCTCGTCTCGGTAGTGGGATACGACGATACCGAAGACAGCTCATGTTATATCCCGCCGTTAACCACCATCAAAC<br>AGGATTTTCGCTGCTGGGGCAAACGAGACC                                                         |
| 49 | GGTCTCGCAAACCAGCGTGGACCGCTTGGTGTGCAACTCTCTCAGGGCCAGGCGGTGAAGGGCAAATCAGCTGTTGCC<br>GTCTCACTGGTGAAAAGAAAAACCACCCTGGCGCCAATACGCAAACCGCCTCTCCCCGCGCGTTGGCCGATTAC<br>GAGACC |
| 50 | GGTCTCGTTCATTAATGCAGCTGGCACGACAGGTTTCCCGACTGGAAAGCGGGCAGTGAGCGCAACGCAATTAAT<br>GTAAGTTAGCTCACTCATTAGGCGAGACC                                                           |
| 51 | GGTCTCGTAGGCACCGGGATCTCGACCGATGCCCTTGAGAGCCTTCAACCCAGTCAGCTCCTTCCGGTGGGCGCGG<br>GGCATGACTATCGTCGCCGCACTTATGCGAGACC                                                     |
| 52 | GGTCTCGTATGACTGTCTTCTTTATCATGCAACTCGTAGGACAGGTGCCGGCAGCGCTCTGGGTCAATTTTCGGCGAG<br>GACCCATCGAGACC                                                                       |

**Table S3. PCR primer sequences**

| Name             | Description                                                                 | Sequence (5' to 3')                   |
|------------------|-----------------------------------------------------------------------------|---------------------------------------|
| pUC57mini-1      | Forward Amplification primer for pre-cloned lac cassette assembly fragments | GGGTTCCGCGCACATTC                     |
| pUC57mini-2      | Reverse Amplification primer for pre-cloned lac cassette assembly fragments | TTTGCTGGCCTTTTGCTCACAT                |
| 1F-10-L-SapIT7P  | Forward Primer: Fragment #1 of 10-part T7 gDNA Linear Assembly              | TCTCACAGTGACGGACC                     |
| 1F-10-C-SapIT7P  | Forward Primer: Fragment #1 of 10-part T7 gDNA Circle Assembly              | AACAGCGCTCTTCCATAATGCAGTTCGCACTAC     |
| 2F-10-SapIT7P    | Forward Primer: Fragment #2 of 10-part T7 gDNA Assembly                     | AACAGCGCTCTTCCCAAGCTGGGCACTAAGGCACTG  |
| 3F-10-SapIT7P    | Forward Primer: Fragment #3 of 10-part T7 gDNA Assembly                     | AACAGCGCTCTTCCAGAACGTGGCTTTGGGAAC     |
| 4F-10-SapIT7P    | Forward Primer: Fragment #4 of 10-part T7 gDNA Assembly                     | AACAGCGCTCTTCCAACAGGGTGAAGAATACG      |
| 5F-10-SapIT7P    | Forward Primer: Fragment #5 of 10-part T7 gDNA Assembly                     | AACAGCGCTCTTCCCTCATCAACCTTAAGCCACCGC  |
| 6F-10-SapIT7P    | Forward Primer: Fragment #6 of 10-part T7 gDNA Assembly                     | AACAGCGCTCTTCCCCACTTCTCGCCACATG       |
| 7F-10-SapIT7P    | Forward Primer: Fragment #7 of 10-part T7 gDNA Assembly                     | AACAGCGCTCTTCCCGAGGTCCAGCTTCACGTC     |
| 8F-10-SapIT7P    | Forward Primer: Fragment #8 of 10-part T7 gDNA Assembly                     | AACAGCGCTCTTCCGCAGTATCGCTTGAAGATTAAC  |
| 9F-10-SapIT7P    | Forward Primer: Fragment #9 of 10-part T7 gDNA Assembly                     | AACAGCGCTCTTCCGCCACAAAGGTACTTACG      |
| 10F-10-L-SapIT7P | Forward Primer: Fragment #10 of 10-part T7 gDNA Assembly                    | AACAGCGCTCTTCCACTCAAAGAGCAATCGATGC    |
| 1R-10-SapIT7P    | Reverse Primer: Fragment #1 of 10-part T7 gDNA Assembly                     | AACAGCGCTCTTCCTTGACTTTCTCAGAGATTTACC  |
| 2R-10-SapIT7P    | Reverse Primer: Fragment #2 of 10-part T7 gDNA Assembly                     | AACAGCGCTCTTCCTCTTCGTTGCCGTAGTCC      |
| 3R-10-SapIT7P    | Reverse Primer: Fragment #3 of 10-part T7 gDNA Assembly                     | AACAGCGCTCTTCCGTTCTTCAAGCATACGCTTAAAG |
| 4R-10-SapIT7P    | Reverse Primer: Fragment #4 of 10-part T7 gDNA Assembly                     | AACAGCGCTCTTCCGAGCGTATAGCGAGAAC       |
| 5R-10-SapIT7P    | Reverse Primer: Fragment #5 of 10-part T7 gDNA Assembly                     | AACAGCGCTCTTCCTGGTCACGGAGGTACGAG      |
| 6R-10-SapIT7P    | Reverse Primer: Fragment #6 of 10-part T7 gDNA Assembly                     | AACAGCGCTCTTCCTCGGACTAGCAAAGTAGAC     |
| 7R-10-SapIT7P    | Reverse Primer: Fragment #7 of 10-part T7 gDNA Assembly                     | AACAGCGCTCTTCCTGCTCGTTCAGCTTCGC       |
| 8R-10-SapIT7P    | Reverse Primer: Fragment #8 of 10-part T7 gDNA Assembly                     | AACAGCGCTCTTCCGGCGACTCTCAGGGAAG       |
| 9R-10-SapIT7P    | Reverse Primer: Fragment #9 of 10-part T7 gDNA Assembly                     | AACAGCGCTCTTCCAGTACTTTCGCAGCCTC       |
| 10R-10-L-SapIT7P | Reverse Primer: Fragment #10 of 10-part T7 gDNA Linear Assembly             | AGGGACACAGAGAGACAC                    |
| 10R-10-C-SapIT7P | Reverse Primer: Fragment #10 of 10-part T7 gDNA Circle Assembly             | AACAGCGCTCTTCCTATCGGCAGCCATGTGAATAG   |
| 1-1FT7V          | Forward T7 phage genome analysis primer (Set 1)                             | TCTGTCTCTCACAGTGACGGACCTAAAGTTC       |
| 1-2FT7V          | Forward T7 phage genome analysis primer (Set 2)                             | TCTGTCTCAGCAATACCGAAAGGTTGTC          |

|                 |                                                          |                                         |
|-----------------|----------------------------------------------------------|-----------------------------------------|
| 1-3FT7V         | Forward T7 phage genome analysis primer (Set 3)          | TCTGTCATGAGGAGACATATGGTCCAG             |
| 1-4FT7V         | Forward T7 phage genome analysis primer (Set 4)          | TCTGTCCCGACTGACTGTTAAGCGGTC             |
| 1-1RT7V         | Reverse T7 phage genome analysis primer (Set 1)          | TCTGTCCGAGCATTAGACATTACGCGATGAC         |
| 1-2RT7V         | Reverse T7 phage genome analysis primer (Set 2)          | TCTGTCATATGCATCACCACAATTCTGTGG          |
| 1-3RT7V         | Reverse T7 phage genome analysis primer (Set 3)          | TCTGTCTTTATCATCCTCAAAGCGTTGC            |
| 1-4RT7V         | Reverse T7 phage genome analysis primer (Set 4)          | TCTGTCCAGGGACACAGAGAGACTCAAG            |
| 1F-52-BsmBIT7P  | Forward Primer: Fragment #1 of 52-part T7 gDNA Assembly  | TCACGGCGTCTCCAAATTTATCAAAAAGAGTATTGACTT |
| 2F-52-BsmBIT7P  | Forward Primer: Fragment #2 of 52-part T7 gDNA Assembly  | TCACGGCGTCTCCAGAAGACTTGCTCAATGAATACT    |
| 3F-52-BsmBIT7P  | Forward Primer: Fragment #3 of 52-part T7 gDNA Assembly  | TCACGGCGTCTCCAGCGAAACGTGTGATGG          |
| 4F-52-BsmBIT7P  | Forward Primer: Fragment #4 of 52-part T7 gDNA Assembly  | TCACGGCGTCTCCATGTACCATACATCACCGACCCG    |
| 5F-52-BsmBIT7P  | Forward Primer: Fragment #5 of 52-part T7 gDNA Assembly  | TCACGGCGTCTCCTAGTCTTATCTTACAGGTCATCT    |
| 6F-52-BsmBIT7P  | Forward Primer: Fragment #6 of 52-part T7 gDNA Assembly  | TCACGGCGTCTCCTCGCACCTGAATACGCTGAG       |
| 7F-52-BsmBIT7P  | Forward Primer: Fragment #7 of 52-part T7 gDNA Assembly  | TCACGGCGTCTCCCTGGAGAACACTTGGTGGGCTGA    |
| 8F-52-BsmBIT7P  | Forward Primer: Fragment #8 of 52-part T7 gDNA Assembly  | TCACGGCGTCTCCACAAGAAGCCTATTCAGACGC      |
| 9F-52-BsmBIT7P  | Forward Primer: Fragment #9 of 52-part T7 gDNA Assembly  | TCACGGCGTCTCCAGACTTAGCGGTCAATTTATG      |
| 10F-52-BsmBIT7P | Forward Primer: Fragment #10 of 52-part T7 gDNA Assembly | TCACGGCGTCTCCGCTGCACACTGGACACCTTCAC     |
| 11F-52-BsmBIT7P | Forward Primer: Fragment #11 of 52-part T7 gDNA Assembly | TCACGGCGTCTCCGGCAGCTATCCTGACGCTTGC      |
| 12F-52-BsmBIT7P | Forward Primer: Fragment #12 of 52-part T7 gDNA Assembly | TCACGGCGTCTCCACCCAGTAAACCACATCTGAAT     |
| 13F-52-BsmBIT7P | Forward Primer: Fragment #13 of 52-part T7 gDNA Assembly | TCACGGCGTCTCCACCGCTGAACCTTACGCTTACAT    |
| 14F-52-BsmBIT7P | Forward Primer: Fragment #14 of 52-part T7 gDNA Assembly | TCACGGCGTCTCCAAGCAGACGAAGACGGAGACT      |
| 15F-52-BsmBIT7P | Forward Primer: Fragment #15 of 52-part T7 gDNA Assembly | TCACGGCGTCTCCTACTGTGGAGGCAGGACG         |
| 16F-52-BsmBIT7P | Forward Primer: Fragment #16 of 52-part T7 gDNA Assembly | TCACGGCGTCTCCAATCTCCGTCTGGCTCTCCC       |
| 17F-52-BsmBIT7P | Forward Primer: Fragment #17 of 52-part T7 gDNA Assembly | TCACGGCGTCTCCAAGGTACGAGTGGCAGTTCT       |
| 18F-52-BsmBIT7P | Forward Primer: Fragment #18 of 52-part T7 gDNA Assembly | TCACGGCGTCTCCGAAACGGATAGACTGCTCGCT      |
| 19F-52-BsmBIT7P | Forward Primer: Fragment #19 of 52-part T7 gDNA Assembly | TCACGGCGTCTCCGGTTTACCCTGGAAGGACTCTA     |
| 20F-52-BsmBIT7P | Forward Primer: Fragment #20 of 52-part T7 gDNA Assembly | TCACGGCGTCTCCAACGGTCACAAGTATGAC         |
| 21F-52-BsmBIT7P | Forward Primer: Fragment #21 of 52-part T7 gDNA Assembly | TCACGGCGTCTCCCGTACGTCACCACATTGAGAAG     |
| 22F-52-BsmBIT7P | Forward Primer: Fragment #22 of 52-part T7 gDNA Assembly | TCACGGCGTCTCCCTACCCGAGATAACGCTAAGAC     |
| 23F-52-BsmBIT7P | Forward Primer: Fragment #23 of 52-part T7 gDNA Assembly | TCACGGCGTCTCCTGGGACGAAGTAAAAGTAAGAC     |
| 24F-52-BsmBIT7P | Forward Primer: Fragment #24 of 52-part T7 gDNA Assembly | TCACGGCGTCTCCTAAGAATCAACTAATGGAAGCTG    |

|                 |                                                          |                                      |
|-----------------|----------------------------------------------------------|--------------------------------------|
| 25F-52-BsmBIT7P | Forward Primer: Fragment #25 of 52-part T7 gDNA Assembly | TCACGGCGTCTCCTCATGAAACGCTTTGGGACTGC  |
| 26F-52-BsmBIT7P | Forward Primer: Fragment #26 of 52-part T7 gDNA Assembly | TCACGGCGTCTCCACGGATACCGAGGGCACCG     |
| 27F-52-BsmBIT7P | Forward Primer: Fragment #27 of 52-part T7 gDNA Assembly | TCACGGCGTCTCCGTAAGAAATCCTTGAGTGTAGCC |
| 28F-52-BsmBIT7P | Forward Primer: Fragment #28 of 52-part T7 gDNA Assembly | TCACGGCGTCTCCATTTCGGCAACGTTCTGCAAAT  |
| 29F-52-BsmBIT7P | Forward Primer: Fragment #29 of 52-part T7 gDNA Assembly | TCACGGCGTCTCCTATCGAGGCTCGCCTTTCTGTTT |
| 30F-52-BsmBIT7P | Forward Primer: Fragment #30 of 52-part T7 gDNA Assembly | TCACGGCGTCTCCTGAGGAACATGAGCAGAACA    |
| 31F-52-BsmBIT7P | Forward Primer: Fragment #31 of 52-part T7 gDNA Assembly | TCACGGCGTCTCCGCACAACCCTGAGGCTG       |
| 32F-52-BsmBIT7P | Forward Primer: Fragment #32 of 52-part T7 gDNA Assembly | TCACGGCGTCTCCCCACTCAGAACAAGG         |
| 33F-52-BsmBIT7P | Forward Primer: Fragment #33 of 52-part T7 gDNA Assembly | TCACGGCGTCTCCTTCGACTCCGCGACTACGATG   |
| 34F-52-BsmBIT7P | Forward Primer: Fragment #34 of 52-part T7 gDNA Assembly | TCACGGCGTCTCCTCTGCATGGAGTATGAGATGGAC |
| 35F-52-BsmBIT7P | Forward Primer: Fragment #35 of 52-part T7 gDNA Assembly | TCACGGCGTCTCCAGGACCAAGTTCTATGGGAAACC |
| 36F-52-BsmBIT7P | Forward Primer: Fragment #36 of 52-part T7 gDNA Assembly | TCACGGCGTCTCCACGCCATTGACTTACAGGGAGA  |
| 37F-52-BsmBIT7P | Forward Primer: Fragment #37 of 52-part T7 gDNA Assembly | TCACGGCGTCTCCTGGCTCGAAATTAATACGACTCA |
| 38F-52-BsmBIT7P | Forward Primer: Fragment #38 of 52-part T7 gDNA Assembly | TCACGGCGTCTCCGTATGCTTGAAGGTTCCCTC    |
| 39F-52-BsmBIT7P | Forward Primer: Fragment #39 of 52-part T7 gDNA Assembly | TCACGGCGTCTCCCGTGGTTTCAACGGGGACAT    |
| 40F-52-BsmBIT7P | Forward Primer: Fragment #40 of 52-part T7 gDNA Assembly | TCACGGCGTCTCCCTATGAAGTTGAAGTACCTTC   |
| 41F-52-BsmBIT7P | Forward Primer: Fragment #41 of 52-part T7 gDNA Assembly | TCACGGCGTCTCCGAGAACCAGAAGAAACTCGAAGA |
| 42F-52-BsmBIT7P | Forward Primer: Fragment #42 of 52-part T7 gDNA Assembly | TCACGGCGTCTCCACTCGATAATGGTTTTGATGTGT |
| 43F-52-BsmBIT7P | Forward Primer: Fragment #43 of 52-part T7 gDNA Assembly | TCACGGCGTCTCCGGTGGCTTTGTGTTTGGCG     |
| 44F-52-BsmBIT7P | Forward Primer: Fragment #44 of 52-part T7 gDNA Assembly | TCACGGCGTCTCCTCCAGACCTGAGGTCAAGGCC   |
| 45F-52-BsmBIT7P | Forward Primer: Fragment #45 of 52-part T7 gDNA Assembly | TCACGGCGTCTCCGGGAGATGGTAAGAAGACTGGC  |
| 46F-52-BsmBIT7P | Forward Primer: Fragment #46 of 52-part T7 gDNA Assembly | TCACGGCGTCTCCGTTTCGGGAAGGAGGTG       |
| 47F-52-BsmBIT7P | Forward Primer: Fragment #47 of 52-part T7 gDNA Assembly | TCACGGCGTCTCCTTGCTACACGTAATACTATCTCT |
| 48F-52-BsmBIT7P | Forward Primer: Fragment #48 of 52-part T7 gDNA Assembly | TCACGGCGTCTCCGAAGCCAAGCGTTCAAG       |
| 49F-52-BsmBIT7P | Forward Primer: Fragment #49 of 52-part T7 gDNA Assembly | TCACGGCGTCTCCGAAAGACGTGTAGTCCACGGAT  |
| 50F-52-BsmBIT7P | Forward Primer: Fragment #50 of 52-part T7 gDNA Assembly | TCACGGCGTCTCCAAAACCTACCGGAACCTC      |
| 51F-52-BsmBIT7P | Forward Primer: Fragment #51 of 52-part T7 gDNA Assembly | TCACGGCGTCTCCATCATTGCGGATGACGTTGAGAT |
| 52F-52-BsmBIT7P | Forward Primer: Fragment #52 of 52-part T7 gDNA Assembly | TCACGGCGTCTCCTGTTTCGGTAAGGTATTACG    |
| 1R-52-BsmBIT7P  | Reverse Primer: Fragment #1 of 52-part T7 gDNA Assembly  | TCACGGCGTCTCCTTCTGCGTCTTCCC          |
| 2R-52-BsmBIT7P  | Reverse Primer: Fragment #2 of 52-part T7 gDNA Assembly  | TCACGGCGTCTCCCGCTGTTGACCATCTCG       |

|                 |                                                          |                                       |
|-----------------|----------------------------------------------------------|---------------------------------------|
| 3R-52-BsmBIT7P  | Reverse Primer: Fragment #3 of 52-part T7 gDNA Assembly  | TCACGGCGTCTCCACATCTCCATTTGAGAACATGAT  |
| 4R-52-BsmBIT7P  | Reverse Primer: Fragment #4 of 52-part T7 gDNA Assembly  | TCACGGCGTCTCCACTATCAGCCCATTAAACATTGCG |
| 5R-52-BsmBIT7P  | Reverse Primer: Fragment #5 of 52-part T7 gDNA Assembly  | TCACGGCGTCTCCGCGAGTTCGATAGTCTCAGAG    |
| 6R-52-BsmBIT7P  | Reverse Primer: Fragment #6 of 52-part T7 gDNA Assembly  | TCACGGCGTCTCCCAGTGGAGACTTAGCGCAAG     |
| 7R-52-BsmBIT7P  | Reverse Primer: Fragment #7 of 52-part T7 gDNA Assembly  | TCACGGCGTCTCCTTGTATTCTGCCACACAGGGAA   |
| 8R-52-BsmBIT7P  | Reverse Primer: Fragment #8 of 52-part T7 gDNA Assembly  | TCACGGCGTCTCCGTCTAACTGGAACAGCTTGTTG   |
| 9R-52-BsmBIT7P  | Reverse Primer: Fragment #9 of 52-part T7 gDNA Assembly  | TCACGGCGTCTCCCAGCTTAAAGGGAACTTTATCTT  |
| 10R-52-BsmBIT7P | Reverse Primer: Fragment #10 of 52-part T7 gDNA Assembly | TCACGGCGTCTCCTGCCAAAGCCGCAAGGAAT      |
| 11R-52-BsmBIT7P | Reverse Primer: Fragment #11 of 52-part T7 gDNA Assembly | TCACGGCGTCTCCGGGTCCATCGCTCGGATTC      |
| 12R-52-BsmBIT7P | Reverse Primer: Fragment #12 of 52-part T7 gDNA Assembly | TCACGGCGTCTCCCGGTACCCAGCGCAG          |
| 13R-52-BsmBIT7P | Reverse Primer: Fragment #13 of 52-part T7 gDNA Assembly | TCACGGCGTCTCCGCTTCTCGGACTCTTCGTCGTC   |
| 14R-52-BsmBIT7P | Reverse Primer: Fragment #14 of 52-part T7 gDNA Assembly | TCACGGCGTCTCCAGTACCATCTCGCTTGATGATAA  |
| 15R-52-BsmBIT7P | Reverse Primer: Fragment #15 of 52-part T7 gDNA Assembly | TCACGGCGTCTCCGATTGTCTAAGGCGTCGTTG     |
| 16R-52-BsmBIT7P | Reverse Primer: Fragment #16 of 52-part T7 gDNA Assembly | TCACGGCGTCTCCCCTTACCAGCAGGTAGAACCCT   |
| 17R-52-BsmBIT7P | Reverse Primer: Fragment #17 of 52-part T7 gDNA Assembly | TCACGGCGTCTCCTTTCAGCCTCGGCGAATGAG     |
| 18R-52-BsmBIT7P | Reverse Primer: Fragment #18 of 52-part T7 gDNA Assembly | TCACGGCGTCTCCAACCATAGTCGCCTTACCG      |
| 19R-52-BsmBIT7P | Reverse Primer: Fragment #19 of 52-part T7 gDNA Assembly | TCACGGCGTCTCCGTTGTGGAACACAATAAGACCG   |
| 20R-52-BsmBIT7P | Reverse Primer: Fragment #20 of 52-part T7 gDNA Assembly | TCACGGCGTCTCCGACGAAGGGTTAAACACAA      |
| 21R-52-BsmBIT7P | Reverse Primer: Fragment #21 of 52-part T7 gDNA Assembly | TCACGGCGTCTCCTAGGTAGTTCAGCAGCTATCTGG  |
| 22R-52-BsmBIT7P | Reverse Primer: Fragment #22 of 52-part T7 gDNA Assembly | TCACGGCGTCTCCCCCATGTGAAAATAAGCACATCT  |
| 23R-52-BsmBIT7P | Reverse Primer: Fragment #23 of 52-part T7 gDNA Assembly | TCACGGCGTCTCCCTTAAGGCTATCGTTCTCAC     |
| 24R-52-BsmBIT7P | Reverse Primer: Fragment #24 of 52-part T7 gDNA Assembly | TCACGGCGTCTCCATGAGGCTCAGGGTC          |
| 25R-52-BsmBIT7P | Reverse Primer: Fragment #25 of 52-part T7 gDNA Assembly | TCACGGCGTCTCCCCGTTTCATCAGAAGACCCACC   |
| 26R-52-BsmBIT7P | Reverse Primer: Fragment #26 of 52-part T7 gDNA Assembly | TCACGGCGTCTCCTTACCGCCAGCAGGAGC        |
| 27R-52-BsmBIT7P | Reverse Primer: Fragment #27 of 52-part T7 gDNA Assembly | TCACGGCGTCTCCAATGCATCTCGTTGGACCACA    |
| 28R-52-BsmBIT7P | Reverse Primer: Fragment #28 of 52-part T7 gDNA Assembly | TCACGGCGTCTCCGATAGCGTCACTTACGGCTTTAG  |
| 29R-52-BsmBIT7P | Reverse Primer: Fragment #29 of 52-part T7 gDNA Assembly | TCACGGCGTCTCCCTCAACGGAACCACCAGACATCA  |
| 30R-52-BsmBIT7P | Reverse Primer: Fragment #30 of 52-part T7 gDNA Assembly | TCACGGCGTCTCCGTGCGTTTCAAGGTGGTTAT     |
| 31R-52-BsmBIT7P | Reverse Primer: Fragment #31 of 52-part T7 gDNA Assembly | TCACGGCGTCTCCGTGGTCTCAATTACGGTAGCAGT  |
| 32R-52-BsmBIT7P | Reverse Primer: Fragment #32 of 52-part T7 gDNA Assembly | TCACGGCGTCTCCGAATAATGTTACAGTAATACC    |

|                 |                                                          |                                           |
|-----------------|----------------------------------------------------------|-------------------------------------------|
| 33R-52-BsmBIT7P | Reverse Primer: Fragment #33 of 52-part T7 gDNA Assembly | TCACGGCGTCTCCAGAGTCGTCTAGCCTCATCTTC       |
| 34R-52-BsmBIT7P | Reverse Primer: Fragment #34 of 52-part T7 gDNA Assembly | TCACGGCGTCTCCTCCTCAGTGTCCAACCTAAAGT       |
| 35R-52-BsmBIT7P | Reverse Primer: Fragment #35 of 52-part T7 gDNA Assembly | TCACGGCGTCTCCGCGTTCTTAGTGAAAGAGATTCT      |
| 36R-52-BsmBIT7P | Reverse Primer: Fragment #36 of 52-part T7 gDNA Assembly | TCACGGCGTCTCCGCCACCACAGGGAGAATA           |
| 37R-52-BsmBIT7P | Reverse Primer: Fragment #37 of 52-part T7 gDNA Assembly | TCACGGCGTCTCCATACTCTCTCCGATAGCC           |
| 38R-52-BsmBIT7P | Reverse Primer: Fragment #38 of 52-part T7 gDNA Assembly | TCACGGCGTCTCCACGCTGATAATCAACGTCC          |
| 39R-52-BsmBIT7P | Reverse Primer: Fragment #39 of 52-part T7 gDNA Assembly | TCACGGCGTCTCCATAGCATCCTTGGCACCGTCT        |
| 40R-52-BsmBIT7P | Reverse Primer: Fragment #40 of 52-part T7 gDNA Assembly | TCACGGCGTCTCCTCTCACTCCAGACCTTC            |
| 41R-52-BsmBIT7P | Reverse Primer: Fragment #41 of 52-part T7 gDNA Assembly | TCACGGCGTCTCCGAGTCGACCAGCACGGAA           |
| 42R-52-BsmBIT7P | Reverse Primer: Fragment #42 of 52-part T7 gDNA Assembly | TCACGGCGTCTCCACCTAAGGCAGCACC              |
| 43R-52-BsmBIT7P | Reverse Primer: Fragment #43 of 52-part T7 gDNA Assembly | TCACGGCGTCTCCTGGACACGTAGCTGTTTCATCC       |
| 44R-52-BsmBIT7P | Reverse Primer: Fragment #44 of 52-part T7 gDNA Assembly | TCACGGCGTCTCCTCCCTCAGCTTTGCTTTGAGA        |
| 45R-52-BsmBIT7P | Reverse Primer: Fragment #45 of 52-part T7 gDNA Assembly | TCACGGCGTCTCCGAACAGTGACGCATGGAGTTCC       |
| 46R-52-BsmBIT7P | Reverse Primer: Fragment #46 of 52-part T7 gDNA Assembly | TCACGGCGTCTCCGCAAAGCGATAGTCTGTATTA        |
| 47R-52-BsmBIT7P | Reverse Primer: Fragment #47 of 52-part T7 gDNA Assembly | TCACGGCGTCTCCCTTCATCTCGGAAACCTTGG         |
| 48R-52-BsmBIT7P | Reverse Primer: Fragment #48 of 52-part T7 gDNA Assembly | TCACGGCGTCTCCTTCCTTGTGATTTACCAATTACT      |
| 49R-52-BsmBIT7P | Reverse Primer: Fragment #49 of 52-part T7 gDNA Assembly | TCACGGCGTCTCCTTTGACTCTGACGCGCAACC         |
| 50R-52-BsmBIT7P | Reverse Primer: Fragment #50 of 52-part T7 gDNA Assembly | TCACGGCGTCTCCTGATAATGTCAGCACGGCTA         |
| 51R-52-BsmBIT7P | Reverse Primer: Fragment #51 of 52-part T7 gDNA Assembly | TCACGGCGTCTCCAACATACCGTCACCGAAGT          |
| 52R-52-BsmBIT7P | Reverse Primer: Fragment #52 of 52-part T7 gDNA Assembly | TCACGGCGTCTCCATTTTAAATTAATCTTTTAAGTCTCTTT |



**Table S4. Lactose Operon Cassette Assembly from 52-fragments**

| Fragment Lot <sup>a</sup> | Assembly Protocol <sup>b</sup> | %Correct <sup>c</sup> | Yield <sup>d</sup> |
|---------------------------|--------------------------------|-----------------------|--------------------|
| Lot 1                     | 37°C/16°C cycling              | 19 ± 2                | 270 ± 40           |
| Lot 1                     | 37°C static                    | 49 ± 2                | 727 ± 160          |
| Lot 2                     | 37°C/16°C cycling              | 10 ± 3                | 4 ± 2              |
| Lot 2                     | 37°C static                    | 16 ± 2                | 12 ± 1             |

<sup>a</sup>To analyze the reproducibility of the assembly results, we generated all 52-fragments in two separate lots (Lot 1 and Lot 2) prepared several months apart.

<sup>b</sup>Reactions to reconstitute the *lac* operon cassette were incubated for 48 h at 37°C or at 37°C/16°C using an oscillating thermocycling protocol (5 minutes at each temperature) and then subjected to a final heat-soak step at 60°C for 5 minutes before being incubated at 4°C prior to transformation. Importantly, we anticipated that the 37°C static protocol would be significantly less efficient due to suboptimal ligation at 37°C; thus, we carried out extended incubation reactions (48 hours).

<sup>c</sup>The percentage of transformants harboring correctly assembled constructs is shown. Experiments were carried out with at least 2 experimental replicates, with the standard deviation from the mean shown.

<sup>d</sup>The yield of colony-forming units harboring correctly assembled constructs per 100 microliters of assembly reaction transformed into *E. coli* cells is shown. At least two experimental replicates were carried out for every assembly reaction, with the standard deviation from the mean shown.

**Table S5. Silent mutations to permit T7 phage genome assembly with SapI**

| Location | Mutation | Coding Sequence         |
|----------|----------|-------------------------|
| 9241     | G → A    | ssDNA binding protein   |
| 14799    | G → A    | DNA polymerase          |
| 20144    | T → A    | unnamed protein product |
| 37066    | C → T    | homology lambda lys Rz  |

**Table S6. Overhang sequences for the T7 phage genome assembly reactions**

| Number of Fragments | Fusion Sites<br>Sequence(genomic location)                                                                                                                                                                                                                                                                                                                                                                                                                                                                                                                                                                                                                                                                                                                                                                                                                          |
|---------------------|---------------------------------------------------------------------------------------------------------------------------------------------------------------------------------------------------------------------------------------------------------------------------------------------------------------------------------------------------------------------------------------------------------------------------------------------------------------------------------------------------------------------------------------------------------------------------------------------------------------------------------------------------------------------------------------------------------------------------------------------------------------------------------------------------------------------------------------------------------------------|
| 10                  | ATA (1052..1054), CAA (4997..4999), AGA (9238..9240), AAC (14798..14800), CTC (20141..20143), CCA (23103..23105), CGA (26229..26231), GCA (29245..29247), GCC (32573..32575), ACT (37067..37069)                                                                                                                                                                                                                                                                                                                                                                                                                                                                                                                                                                                                                                                                    |
| 52                  | AAAT (443..446), AGAA (1218..1221), AGCG (2132..2135), ATGT (2640..2543), TAGT (3101..3104), TCGC (3907..3910), CTGG (4659..4662), ACAA (5386..5389), AGAC (6202..6205), GCTG (6888..6891), GGCA (7643..7646), ACCC (8452..8455), ACCG (9191..9194), AAGC (9831..9834), TACT (10870..10873), AATC (11360..11363), AAGG (12243..12246), GAAA (12765..12768), GGTT (13679..13682), CAAC (14529..14532), CGTC (15362..15365), CCTA (15898..15901), TGGG (16774..16777), TAAG (17448..17451), TCAT (18256..18259), ACGG (18984..18987), GTAA (19785..19785), CATT (20754..20757), TATC (21280..21283), TGAG (22021..22024), GCAC (22585..22588), CCAC (23466..23469), TTCG (24592..24595), TCTG (24736..24739), AGGA (25740..25743), ACGC (26583..26586), TGGC (27246..27249), GTAT (27990..27993), CGTG (28817..28820), CTAT (29655..29658), GAGA (30404//30407), ACTC |

|                                                                                                                                                                                                                                           |
|-------------------------------------------------------------------------------------------------------------------------------------------------------------------------------------------------------------------------------------------|
| (31347..31350), GGTG (31771..31774), TCCA (32695..32698), GGGA<br>(33102..33105), GTTC (33399..33402), TTGC (34778..34781), GAAG<br>(35248..35251), GGAA (36300..36303), CAAA (37189..37192), ATCA<br>(37838..37841), TGTT (38649..38652) |
|-------------------------------------------------------------------------------------------------------------------------------------------------------------------------------------------------------------------------------------------|

**Table S7. Frequency of Type IIS recognition sites in T7 bacteriophage genome**

| Type IIS Restriction enzyme <sup>1</sup> | Number of Recognition Sites |
|------------------------------------------|-----------------------------|
| SapI (BspQI, LguI)                       | 4                           |
| PaqCI (AarI)                             | 5                           |
| BsmBI (Esp3I)                            | 16                          |
| BsaI (Eco31I)                            | 29                          |
| BbsI (BpiI)                              | 38                          |

<sup>1</sup>Isoschizomer(s) are shown in brackets

**Table S8. Silent mutations to permit T7 phage genome assembly with BsmBI**

| Location | Mutation | Coding Sequence         |
|----------|----------|-------------------------|
| 2137     | G → A    | protein kinase          |
| 2614     | C → T    | protein kinase          |
| 10867    | C → T    | lysozyme                |
| 12767    | G → A    | primase/helicase        |
| 15366    | T → A    | DNA polymerase          |
| 18262    | G → A    | exonuclease             |
| 18983    | G → A    | unnamed protein product |
| 20752    | C → T    | head-tail connector     |
| 22582    | G → A    | scaffolding protein     |
| 24596    | T → A    | tail protein            |
| 24734    | T → A    | tail protein            |
| 31347    | T → A    | internal virion         |
| 32694    | C → G    | internal virion         |
| 33108    | C → T    | internal virion         |
| 33396    | T → A    | internal virion         |
| 35247    | C → T    | tail fiber protein      |

**Table S9. SNPs differentiating our in-lab T7 strain from the Genbank strain.**

| Location | Mutation | Coding Sequence         |
|----------|----------|-------------------------|
| 1895     | G → GA   | unnamed protein product |
| 6238     | C → T    | unnamed protein product |
| 10001    | C → T    | unnamed protein product |
| 30809    | G → A    | internal virion         |

**Table S10. Novel SNPs from reconstituted phage genomes identified by nanopore sequencing**

| Plaque # | Location | Mutation | Coding Sequence         |
|----------|----------|----------|-------------------------|
| 2        | 7609     | T → G    | unnamed protein product |
| 6        | 14378    | A → G    | DNA polymerase          |
| 9        | 26773    | G → T    | tail protein            |
